# Supplementary material for: Tailoring tantalum doping into a perovskite ferrite to obtain a highly active and stable anode for solid oxide fuel cells
Source: Royal Society of Chemistry journal article supplement (doi:10.1039/d0ta04857g), 2020-01-01
Supplement: d0ta04857g1.pdf [file d0ta04857g1.pdf]

## Supplementary information

### **Tailoring tantalum doping into perovskite ferrite to obtain highly active and stable anode for solid oxide fuel cells**

Jingwei Li<sup>a\*</sup>, Zhaoming Fu<sup>b†</sup>, Bo Wei<sup>a\*</sup>, Chaoxiang Su<sup>a</sup>, Xing Yue<sup>a</sup>, Zhe Lü<sup>a\*</sup>

<sup>a</sup>School of Physics, Harbin Institute of Technology, Harbin 150001, P.R. China.

<sup>b</sup>School of Physics, Henan Normal University, Xinxiang 453007, P.R. China.

†These authors contributed equally to this work: Jingwei Li, Zhaoming Fu.

Corresponding authors: [16b911015@stu.hit.edu.cn](mailto:16b911015@stu.hit.edu.cn) (Jingwei Li); [bowei@hit.edu.cn](mailto:bowei@hit.edu.cn)

(Bo Wei); [lvzhe@hit.edu.cn](mailto:lvzhe@hit.edu.cn) (Zhe Lü)

## Supplementary figures

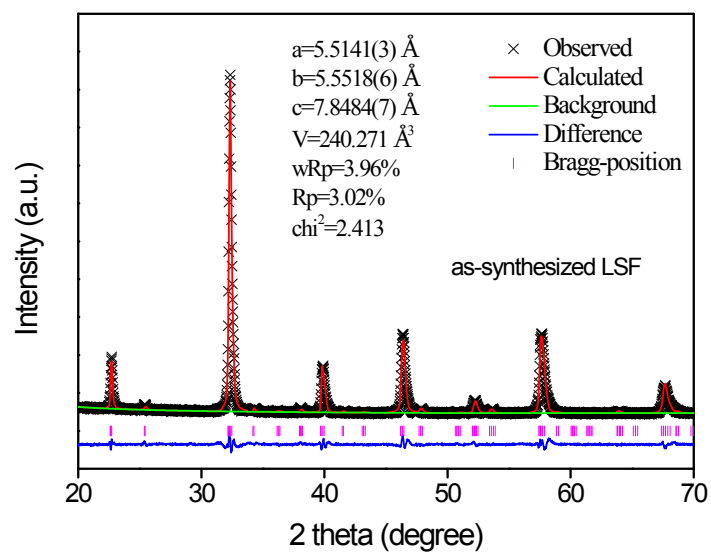

Fig. S1. XRD Rietveld refinement of as-synthesized  $\text{La}_{0.8}\text{Sr}_{0.2}\text{FeO}_{3-\delta}$  (LSF) powder conducted by GSAS software.

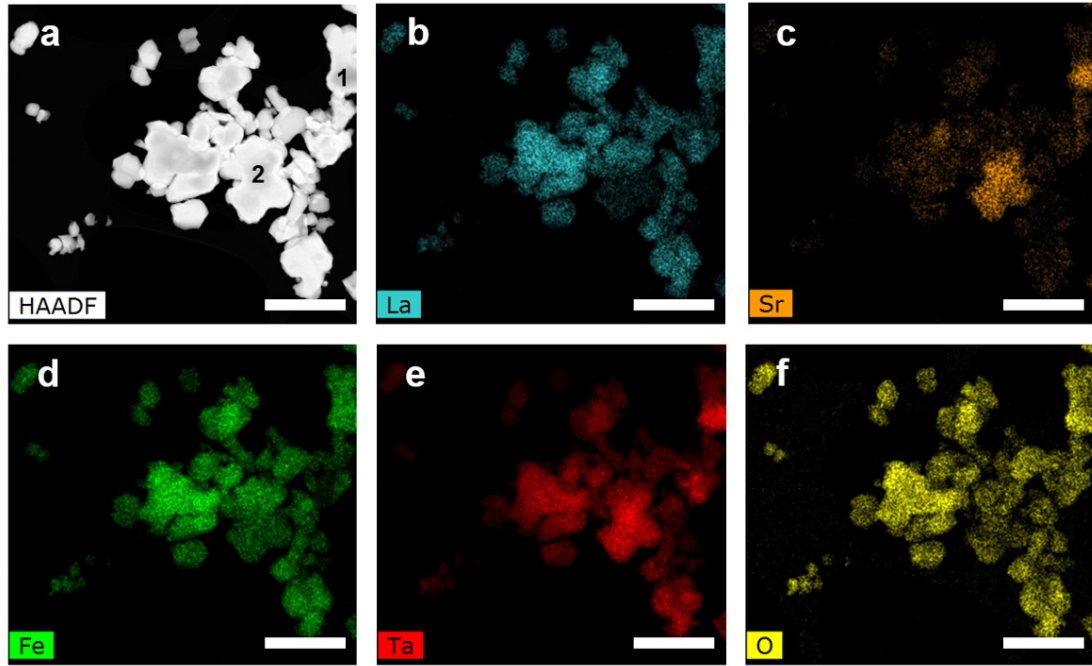

Fig. S2. EDS elemental mapping of as-prepared LSFTa05 particles. (a) HAADF image, (b) La, (c) Sr, (d) Fe, (e) Ta, (f) O. Scale bar is 100 nm.

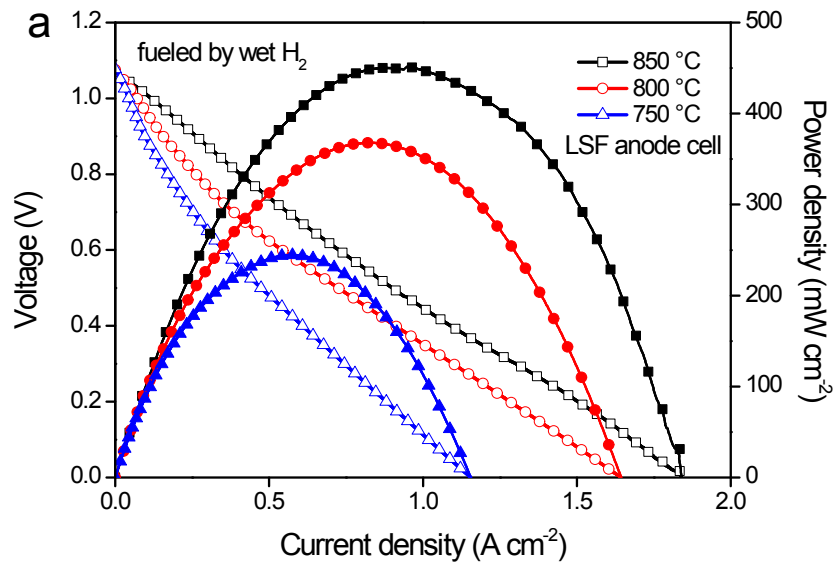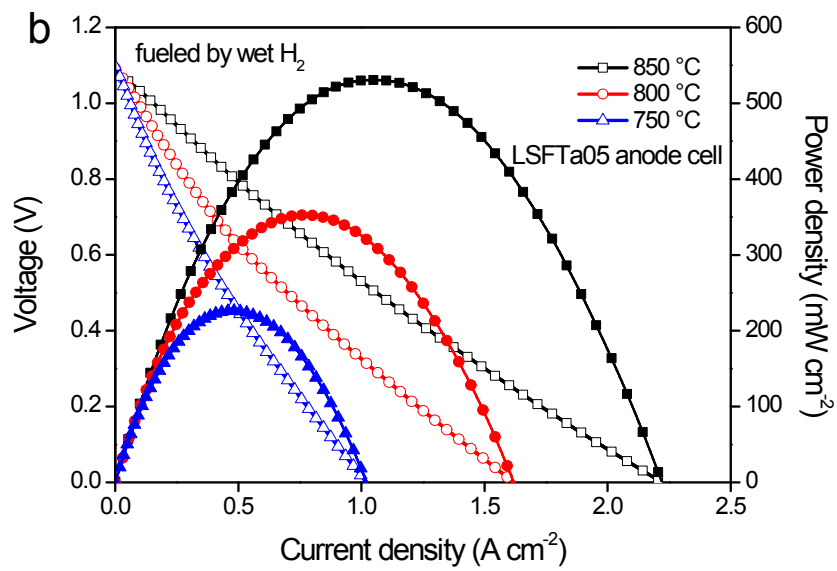

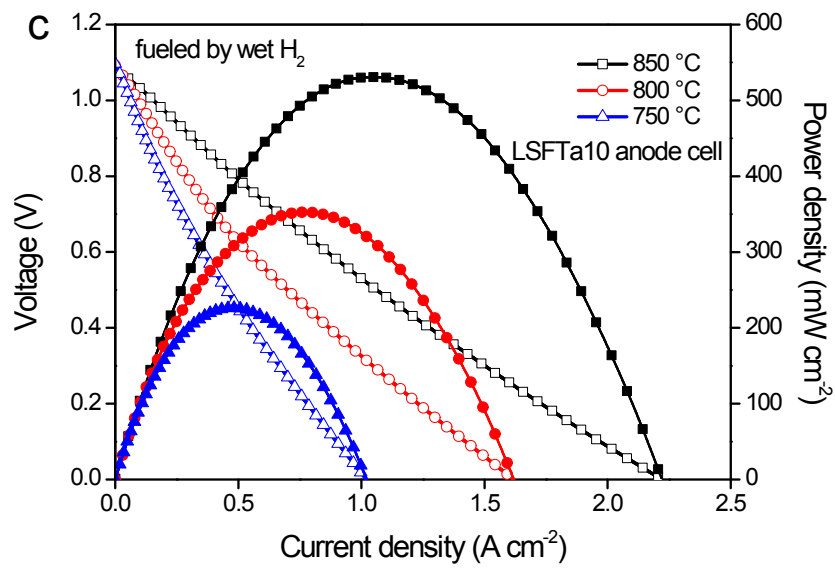

Fig. S3.  $V$ - $I$  polarization curves and the corresponding power densities of (a) LSF anode cell, (b) LSFTa05 anode cell and (c) LSFTa10 anode cell fuel by wet hydrogen at the beginning of the test.

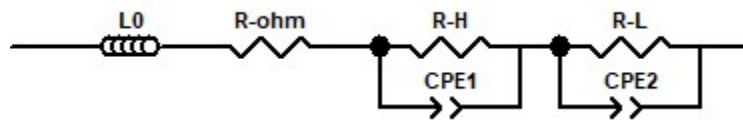

Fig. S4. An equivalent circuit model for electrochemical impedance spectra fitting.

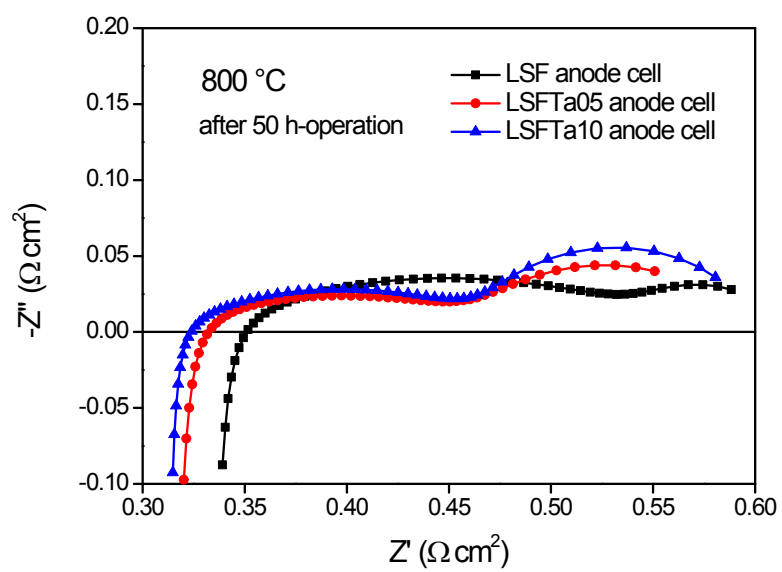

Fig. S5 AC impedance spectra of LSF, LSFTa05 and LSFTa10 anode cells after discharging in wet  $\text{H}_2$  at 800 °C for 50 h.

Table S1. Temperature dependence of initial maximum power densities of the three anode cells fueled by wet hydrogen.

| MPD (mW cm <sup>-2</sup> ) | LSF anode cell | LSFTa05 anode cell | LSFTa10 anode cell |
|----------------------------|----------------|--------------------|--------------------|
| 850 °C                     | 450.2          | 530.9              | 488.4              |
| 800 °C                     | 367.9          | 352.6              | 298.4              |
| 750 °C                     | 244.5          | 226.4              | 220.7              |



Table S2. Electrochemical performance of single cells we fabricated and other cells with similar configurations using hydrogen as fuel.

| Anode                | Electrolyte | Thickness<br>( $\mu\text{m}$ ) | Cathode         | $T$ ( $^{\circ}\text{C}$ ) | MPD<br>( $\text{mW cm}^{-2}$ ) | $R_p$<br>( $\Omega \text{ cm}^2$ ) | Testing<br>time |
|----------------------|-------------|--------------------------------|-----------------|----------------------------|--------------------------------|------------------------------------|-----------------|
| LSFT05               | ScSZ        | 400                            | LSM-ScSZ        | 800                        | 441.7                          | 0.288                              | 50 h            |
| LSFTa10              | ScSZ        | 400                            | LSM-ScSZ        | 800                        | 381.7                          | 0.295                              | 50 h            |
| LSFNb <sup>[1]</sup> | ScSZ        | 400                            | LSM-ScSZ        | 800                        | 241.6                          | 1.55                               | 100 h           |
| LST-1 <sup>[2]</sup> | YSZ         | 400                            | LSM             | 900                        | 31                             | /                                  | /               |
| LST-2 <sup>[3]</sup> | YSZ         | 500                            | LSM             | 1000                       | 175                            | /                                  | /               |
| LSTF <sup>[4]</sup>  | YSZ         | 400                            | LSTF            | 800                        | 215                            | 0.36                               | ~40 h           |
| LSCM <sup>[5]</sup>  | YSZ         | 200                            | LSCM            | 900                        | 300                            | 0.78                               | Initial         |
| SFMO <sup>[6]</sup>  | LSGM-1      | 265                            | SFMO            | 800                        | 500                            | 0.51                               | 500 h           |
| LCFNb <sup>[7]</sup> | ScSZ        | 58                             | LSM-YSZ         | 800                        | 610                            | 0.35                               | Initial         |
| PBMO <sup>[8]</sup>  | LSGM-1      | 300                            | NBSCF50-<br>GDC | 800                        | ~430                           | /                                  | 100 h           |
| SMMO <sup>[9]</sup>  | LSGM-2      | 300                            | SCF             | 800                        | 838                            | /                                  | 200 h           |

LSFNb:  $\text{La}_{0.8}\text{Sr}_{0.2}\text{Fe}_{0.9}\text{Nb}_{0.1}\text{O}_{3-\delta}$  LST-1:  $\text{La}_{0.3}\text{Sr}_{0.7}\text{TiO}_{3-\delta}$  LST-2:  $\text{La}_{0.4}\text{Sr}_{0.6}\text{TiO}_{3-\delta}$

LSTF:  $\text{La}_{0.3}\text{Sr}_{0.7}\text{Ti}_{0.3}\text{Fe}_{0.7}\text{O}_{3-\delta}$  LSCM:  $\text{La}_{0.75}\text{Sr}_{0.25}\text{Cr}_{0.5}\text{Mn}_{0.5}\text{O}_{3-\delta}$

SFMO:  $\text{Sr}_2\text{FeMoO}_{6-\delta}$  LSGM-1:  $\text{La}_{0.9}\text{Sr}_{0.1}\text{Ga}_{0.8}\text{Sr}_{0.2}\text{O}_{3-\delta}$  LCFNb:  $\text{La}_{0.9}\text{Ca}_{0.1}\text{Fe}_{0.9}\text{Nb}_{0.1}\text{O}_{3-\delta}$

PBMO:  $\text{PrBaMn}_2\text{O}_{5+\delta}$  SMMO:  $\text{Sr}_2\text{MgMoO}_{6-\delta}$  LSGM-2:  $\text{La}_{0.8}\text{Sr}_{0.2}\text{Ga}_{0.87}\text{Sr}_{0.13}\text{O}_{3-\delta}$

SCF:  $\text{SrCo}_{0.8}\text{Fe}_{0.2}\text{O}_{3-\delta}$

## References

- [1] J. Li, B. Wei, Z. Cao, X. Yue, Y. Zhang, Z. Lü, *ChemSusChem*, 2018, **11**, 254-263.
- [2] Z. Du, H. Zhao, X. Zhou, Z. Xie, *International Journal of Hydrogen Energy*, 2013, **38**, 1068-1073.
- [3] R. Mukundan, E. L. Brosha, F. H. Garzon, *Electrochemical and Solid State Letters*, 2004, **7**, A5-A7.
- [4] Z. Cao, Y. Zhang, J. Miao, Z. Wang, Z. Lü, Y. Sui, X. Huang, W. Jiang, *International Journal of Hydrogen Energy*, 2015, **40**, 16572-16577.
- [5] D. M. Bastidas, S. Tao, J. T. S. Irvine, *Journal of Materials Chemistry*, 2006, **16**, 1603-1605.
- [6] Q. Liu, X. Dong, G. Xiao, F. Zhao, F. Chen, *Advanced Materials*, 2010, **22**, 5478-5482.
- [7] X. Kong, X. Zhou, Y. Tian, X. Wu, J. Zhang, W. Zuo, X. Gong, Z. Guo, *Journal of Power Sources*, 2016, **316**, 224-231.
- [8] S. Sengodan, S. Choi, A. Jun, T. H. Shin, Y. Ju, H. Y. Jeong, J. Shin, J. T. S. Irvine, G. Kim, *Nature Materials*, 2015, **14**, 205-209.
- [9] Y. Huang, R. I. Dass, Z. Xing, J. B. Goodenough, *Science*, 2006, **312**, 254-257.
